# Supplementary material for: Mechanochemical preparation of donor/acceptor adducts based on coronene and silver(i) pyrazolate metallacycles
Source: Royal Society of Chemistry journal article supplement (doi:10.1039/d3nj02614k), 2023-01-01
Supplement: d3nj02614k1.pdf [file d3nj02614k1.pdf]

# Mechanochemical preparations of Donor/Acceptor materials based on coronene and silver(I) pyrazolate metallacycles.

Lorenzo Luciani,<sup>a</sup> Nicola Sargentoni,<sup>a</sup> Claudio Magini,<sup>a</sup> Rossana Galassi,<sup>a\*</sup>

*School of Science and Technology, Chemistry Division, University of Camerino, Camerino, I-62032, Italy.*

## Supporting information

### Index of Contents

|                                                                                                                                                                                                                  |    |
|------------------------------------------------------------------------------------------------------------------------------------------------------------------------------------------------------------------|----|
| <b>NMR studies</b> .....                                                                                                                                                                                         |    |
| <b>Table S1.</b> A selection of <sup>1</sup> H NMR chemical shifts of adducts <b>1-3</b> and of the starting compounds.....                                                                                      | 2  |
| <b>IR spectroscopy studies</b> .....                                                                                                                                                                             | 3  |
| <b>Table S2.</b> Main IR absorptions for adducts <b>1-3</b> and relative vibrational modes .....                                                                                                                 | 3  |
| <b>Table S3.</b> EDX analysis of the sample treated with solventless mechanochemical grinding. ....                                                                                                              | 5  |
| <b>Table S4.</b> EDX analysis of the sample treated with LAG (Liquid Assisted Grinding).....                                                                                                                     | 5  |
| <b>Figure S1.</b> <sup>1</sup> H NMR spectra of {[3,5-(CF <sub>3</sub> ) <sub>2</sub> pz]Ag} <sub>3</sub> @Coronene ( <b>1</b> ), {[3,5-(CF <sub>3</sub> ) <sub>2</sub> pz]Ag} <sub>3</sub> , and coronene ..... | 6  |
| <b>Figure S2.</b> <sup>1</sup> H NMR spectra of {[3,5-(NO <sub>2</sub> ) <sub>2</sub> pz]Ag} <sub>3</sub> @Coronene ( <b>2</b> ), {[3,5-(NO <sub>2</sub> ) <sub>2</sub> pz]Ag} <sub>3</sub> , and coronene ..... | 7  |
| <b>Figure S3.</b> <sup>1</sup> H NMR spectra of {[3,5-(CF <sub>3</sub> ) <sub>2</sub> pz]Cu} <sub>3</sub> @Coronene ( <b>3</b> ), {[3,5-(CF <sub>3</sub> ) <sub>2</sub> pz]Cu} <sub>3</sub> and coronene.....    | 8  |
| <b>Figure S4.</b> IR spectra superimposition of the microcrystalline products <b>1-3</b> obtained by solvent-mediated syntheses and LAG .....                                                                    | 9  |
| <b>Figure S5.</b> TGA plots with decomposition patterns of adducts <b>1-3</b> .....                                                                                                                              | 10 |
| <b>Figure S6.</b> Normalized and absolute solid-state excitation/emission spectra of the adducts <b>1</b> , and <b>2</b> . ....                                                                                  | 12 |
| <b>Figure S7.</b> Solid state emission spectra of the coronene, of the [(CF <sub>3</sub> ) <sub>2</sub> pzCu] <sub>3</sub> and of the adduct <b>3</b> upon excitation at 320 nm at room temperature .....        | 13 |
| <b>Figure S8.</b> Normalized solid state excitation/emission spectra of the coronene/[(CF <sub>3</sub> ) <sub>2</sub> pzCu] <sub>3</sub> , adduct <b>3</b> at different excitation wavelengths. ....             | 14 |
| <b>Figure S9.</b> Excitation and emission spectra for CTCs and coronene.....                                                                                                                                     | 15 |
| <b>Figure S10.</b> PL titration curves obtained by titrating a DCM solution of coronene with [(CF <sub>3</sub> ) <sub>2</sub> pzCu] <sub>3</sub> .....                                                           | 16 |
| <b>Figure S11.</b> Tauc plots of [(CF <sub>3</sub> ) <sub>2</sub> pzAg] <sub>3</sub> with direct and indirect band gap calculations .....                                                                        | 17 |
| <b>Figure S12.</b> Tauc plots of coronene with direct and indirect band gap calculations .....                                                                                                                   | 17 |
| <b>REFERENCE</b> .....                                                                                                                                                                                           | 18 |

## NMR studies

**Table S1.** A selection of  $^1\text{H}$  NMR chemical shifts of adducts **1-3** and of the starting compounds.  $\Delta_{\text{ppm}}$  is the difference of the chemical shift of the hydrogen  $\text{C}_4\text{-H}$  of the pyrazole of the CTC upon stacking with the Coronene (third column) and of the terminal hydrogen of coronene upon stacking with the CTC (last column). Data are relative to  $^1\text{H}$  NMR spectra acquired in  $\text{DMSO}^{\text{a}}$  or  $\text{CD}_2\text{Cl}_2^{\text{b}}$ .

| Compounds                                                              | $^1\text{H}$ NMR CTCs $\text{C}_4\text{-H}$ resonance (ppm) | $\Delta_{\text{ppm}}$ CTCs $\text{C}_4\text{-H}$ resonance (ppm) | $^1\text{H}$ NMR Coronene $\text{C-H}$ resonance (ppm) | $\Delta_{\text{ppm}}$ Coronene $\text{C-H}$ resonance (ppm) |
|------------------------------------------------------------------------|-------------------------------------------------------------|------------------------------------------------------------------|--------------------------------------------------------|-------------------------------------------------------------|
| Coronene                                                               | -                                                           | -                                                                | 9.10 <sup>a</sup> ; 8.98 <sup>b</sup>                  | -                                                           |
| $[\text{pz}^{\text{CF}_3}\text{Ag}]_3$                                 | 7.20 <sup>a</sup>                                           | -                                                                | -                                                      | -                                                           |
| $[\text{pz}^{\text{NO}_2}\text{Ag}]_3$                                 | 7.56 <sup>a</sup>                                           | -                                                                | -                                                      | -                                                           |
| $[\text{pz}^{\text{CF}_3}\text{Cu}]_3$                                 | 7.07 <sup>b</sup>                                           | -                                                                | -                                                      | -                                                           |
| $\{[3,5\text{-(CF}_3)_2\text{pz}]\text{Ag}\}_3@$ Coronene ( <b>1</b> ) | 7.10 <sup>a</sup>                                           | -0.10                                                            | 9.10 <sup>a</sup>                                      | 0                                                           |
| $\{[3,5\text{-(NO}_2)_2\text{pz}]\text{Ag}\}_3@$ Coronene ( <b>2</b> ) | 7.40 <sup>a</sup>                                           | -0.16                                                            | 9.10 <sup>a</sup>                                      | 0                                                           |
| $\{[3,5\text{-(CF}_3)_2\text{pz}]\text{Cu}\}_3@$ Coronene ( <b>3</b> ) | 7.04 <sup>b</sup>                                           | -0.03                                                            | 8.95 <sup>b</sup>                                      | -0.03                                                       |

## IR spectroscopy studies

**Table S2.** Main IR absorptions for adducts **1-3** and relative vibrational modes; notes on the redshifts or blueshifts, on comparison with the absorptions of the coronene and the corresponding starting CTC.

| $\{[3,5-(CF_3)_2pz]Ag\}_3 @$<br>Coronene (cm <sup>-1</sup> ) ( <b>1</b> ) | Coronene (cm <sup>-1</sup> ) | $\{[3,5-(CF_3)_2pz]Ag\}_3$<br>(cm <sup>-1</sup> ) | Main<br>Vibrational<br>mode     | Reference | notes     |
|---------------------------------------------------------------------------|------------------------------|---------------------------------------------------|---------------------------------|-----------|-----------|
| 3149                                                                      |                              | 3153                                              | C <sub>4</sub> -H<br>stretching | [1]       | REDSHIFT  |
| 3063                                                                      | 3047                         |                                                   | Aromatic C-H<br>stretching      | [2]       | BLUESHIFT |
| 3028                                                                      | 3018                         |                                                   |                                 | [2]       | BLUESHIFT |
| 1619                                                                      | 1615                         |                                                   | Aromatic C-C<br>stretching      | [2]       | BLUESHIFT |
| 1610                                                                      | 1607                         |                                                   | Aromatic C-C<br>stretching      | [2]       | BLUESHIFT |
| 1501                                                                      |                              | 1505                                              | Aromatic C=N<br>stretching      | [1]       | REDSHIFT  |
| 1315                                                                      | 1312                         |                                                   | Aromatic C-C<br>stretching      | [2]       | BLUESHIFT |
| 1126                                                                      |                              | 1143                                              | C-F stretching                  | [3]       | REDSHIFT  |
| 861                                                                       | 847                          |                                                   | In-plane C-H<br>bending         | [2]       | BLUESHIFT |

| $\{[3,5-(CF_3)_2pZ]Cu\}_3$<br>@ Coronene (cm <sup>-1</sup> )<br>(3) | Coronene (cm <sup>-1</sup> ) | $\{[3,5-(CF_3)_2pZ]Ag\}_3$<br>(cm <sup>-1</sup> ) | Main Vibrational mode        | Reference | notes     |
|---------------------------------------------------------------------|------------------------------|---------------------------------------------------|------------------------------|-----------|-----------|
| 3149                                                                |                              | 3163                                              | C <sub>4</sub> -H stretching | [1]       | REDSHIFT  |
| 3061                                                                | 3048                         |                                                   | Aromatic C-H stretching      | [2]       | BLUESHIFT |
| 3026                                                                | 3018                         |                                                   |                              | [2]       | BLUESHIFT |
| 1618                                                                | 1614                         |                                                   | Aromatic C-C stretching      | [2]       | BLUESHIFT |
| 1610                                                                | 1607                         |                                                   |                              | [2]       | BLUESHIFT |
| 1505                                                                |                              | 1508                                              | Aromatic C=N stretching      | [1]       | REDSHIFT  |
| 1315                                                                | 1312                         |                                                   | Aromatic C-C stretching      | [2]       | BLUESHIFT |
| 1123                                                                |                              | 1126                                              | C-F stretching               | [3]       | REDSHIFT  |
| 968                                                                 | 957                          |                                                   | C-H bending                  | [2]       | BLUESHIFT |
| 861                                                                 | 847                          |                                                   | In-planes C-H bending        | [2]       | BLUESHIFT |

**Table S3** EDX analysis of the surface of the samples treated with solventless mechanochemical grinding top: Spot 1; bottom: Spot 2.

| Element  | At. No. | Net    | Mass [%]          | Norm. Mass [%]    | Atom [%]          | abs. error [%]<br>(1 sigma) | abs. error [%]<br>(2 sigma) | abs. error [%]<br>(3 sigma) |
|----------|---------|--------|-------------------|-------------------|-------------------|-----------------------------|-----------------------------|-----------------------------|
| Carbon   | 6       | 133944 | 88.33             | 88.33             | 91.57             | 9.34                        | 18.68                       | 28.02                       |
| Oxygen   | 8       | 6523   | 9.62              | 9.62              | 7.49              | 1.23                        | 2.45                        | 3.68                        |
| Fluorine | 9       | 1132   | 1.16              | 1.16              | 0.76              | 0.21                        | 0.42                        | 0.63                        |
| Silicon  | 14      | 253    | 0.24              | 0.24              | 0.11              | 0.03                        | 0.07                        | 0.10                        |
| Silver   | 47      | 269    | 0.65              | 0.65              | 0.07              | 0.05                        | 0.10                        | 0.15                        |
|          |         |        | <b>Sum 100.00</b> | <b>Sum 100.00</b> | <b>Sum 100.00</b> |                             |                             |                             |
| Element  | At. No. | Net    | Mass [%]          | Norm. Mass [%]    | Atom [%]          | abs. error [%]<br>(1 sigma) | abs. error [%]<br>(2 sigma) | abs. error [%]<br>(3 sigma) |
| Carbon   | 6       | 46475  | 26.86             | 37.51             | 59.43             | 2.96                        | 5.92                        | 8.88                        |
| Nitrogen | 7       | 2383   | 3.86              | 5.39              | 7.33              | 0.57                        | 1.14                        | 1.71                        |
| Oxygen   | 8       | 3847   | 4.05              | 5.66              | 6.73              | 0.56                        | 1.12                        | 1.68                        |
| Fluorine | 9       | 18682  | 14.79             | 20.65             | 20.69             | 1.72                        | 3.44                        | 5.16                        |
| Silicon  | 14      | 601    | 0.57              | 0.80              | 0.54              | 0.05                        | 0.10                        | 0.15                        |
| Silver   | 47      | 10382  | 21.48             | 29.99             | 5.29              | 0.81                        | 1.62                        | 2.42                        |
|          |         |        | <b>Sum 71.61</b>  | <b>Sum 100.00</b> | <b>Sum 100.00</b> |                             |                             |                             |

**Table S4** EDX analysis of the surface of the samples treated with LAG (Liquid Assisted Grinding) top: Spot 3; bottom: Spot 4.

| Element   | At. No. | Net   | Mass [%]         | Norm. Mass [%]    | Atom [%]          | abs. error [%]<br>(1 sigma) | rel. error [%]<br>(1 sigma) |
|-----------|---------|-------|------------------|-------------------|-------------------|-----------------------------|-----------------------------|
| Carbon    | 6       | 39769 | 26.21            | 32.65             | 51.65             | 2.91                        | 11.10                       |
| Nitrogen  | 7       | 2463  | 3.85             | 4.80              | 6.51              | 0.57                        | 14.68                       |
| Oxygen    | 8       | 8320  | 8.45             | 10.53             | 12.50             | 1.06                        | 12.49                       |
| Fluorine  | 9       | 19762 | 15.98            | 19.91             | 19.91             | 1.85                        | 11.58                       |
| Aluminium | 13      | 1256  | 0.64             | 0.80              | 0.56              | 0.05                        | 8.33                        |
| Silicon   | 14      | 6421  | 5.37             | 6.69              | 4.53              | 0.24                        | 4.56                        |
| Silver    | 47      | 10430 | 19.77            | 24.63             | 4.34              | 0.75                        | 3.77                        |
|           |         |       | <b>Sum 80.26</b> | <b>Sum 100.00</b> | <b>Sum 100.00</b> |                             |                             |
| Element   | At. No. | Net   | Mass [%]         | Norm. Mass [%]    | Atom [%]          | abs. error [%]<br>(1 sigma) | rel. error [%]<br>(1 sigma) |
| Carbon    | 6       | 36029 | 25.08            | 31.94             | 50.49             | 2.80                        | 11.15                       |
| Nitrogen  | 7       | 2205  | 3.56             | 4.54              | 6.15              | 0.53                        | 14.96                       |
| Oxygen    | 8       | 8918  | 9.29             | 11.83             | 14.04             | 1.15                        | 12.39                       |
| Fluorine  | 9       | 17903 | 15.04            | 19.15             | 19.14             | 1.75                        | 11.66                       |
| Aluminium | 13      | 1450  | 0.79             | 1.01              | 0.71              | 0.06                        | 7.60                        |
| Silicon   | 14      | 7190  | 6.15             | 7.83              | 5.30              | 0.28                        | 4.50                        |
| Silver    | 47      | 9706  | 18.61            | 23.69             | 4.17              | 0.70                        | 3.78                        |
|           |         |       | <b>Sum 78.53</b> | <b>Sum 100.00</b> | <b>Sum 100.00</b> |                             |                             |

**Figure S1.** Overlapped  $^1\text{H}$  NMR spectra of  $\{[3,5-(\text{CF}_3)_2\text{pz}]\text{Ag}\}_3@$ Coronene (**1**) (blue line),  $\{[3,5-(\text{CF}_3)_2\text{pz}]\text{Ag}\}_3$  (red line), and coronene (green line).

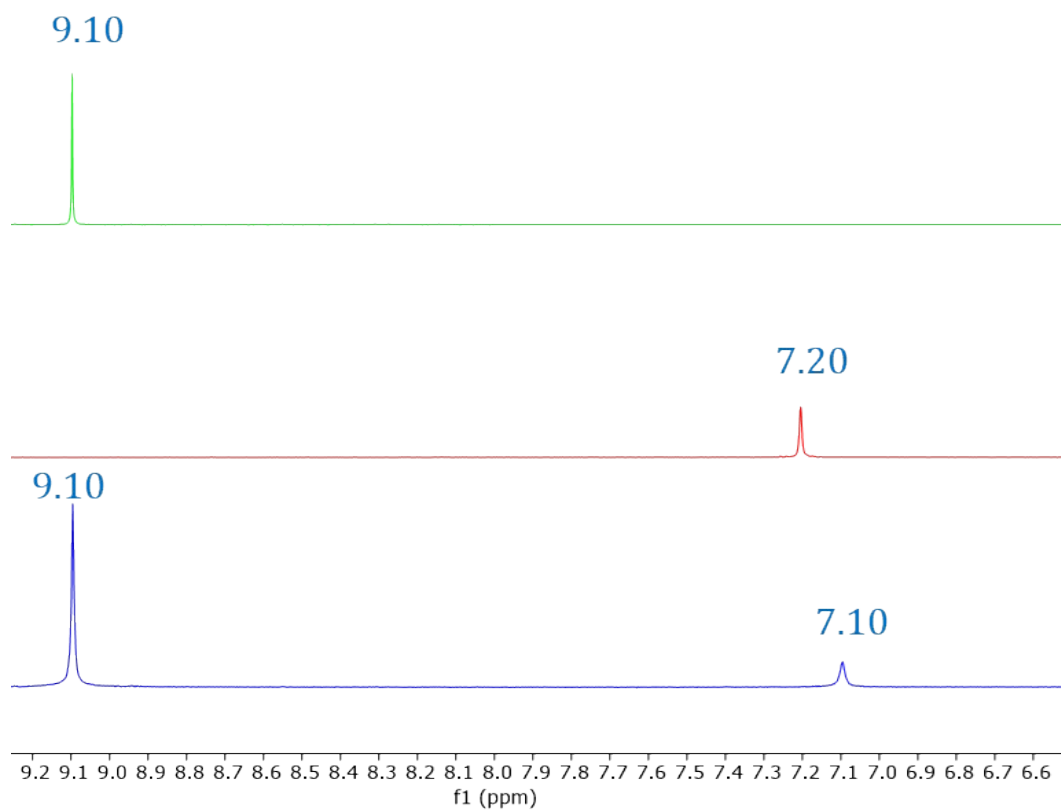

**Figure S2.** Overlapped  $^1\text{H}$  NMR spectra of  $\{[3,5-(\text{NO}_2)_2\text{pz}]\text{Ag}\}_3@$ Coronene (**2**) (orange line),  $\{[3,5-(\text{NO}_2)_2\text{pz}]\text{Ag}\}_3$  (blue line), and coronene (red line).

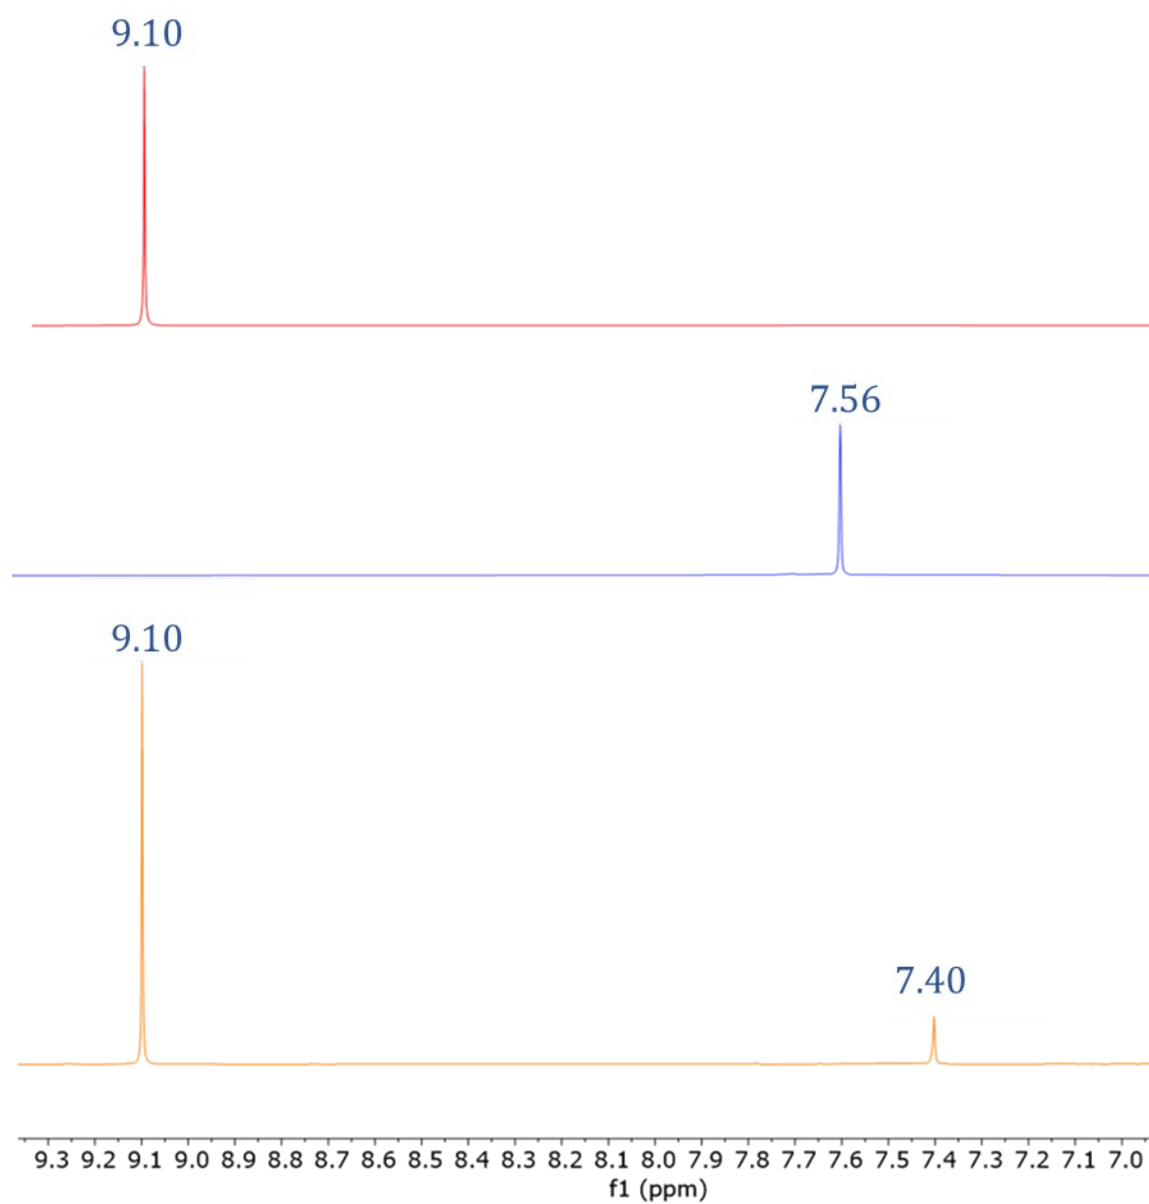

**Figure S3.** Overlapped  $^1\text{H}$  NMR spectra of  $\{[3,5-(\text{CF}_3)_2\text{pz}]\text{Cu}\}_3@$ Coronene (**3**) (orange line),  $\{[3,5-(\text{CF}_3)_2\text{pz}]\text{Cu}\}_3$  (blue line), and coronene (red line).

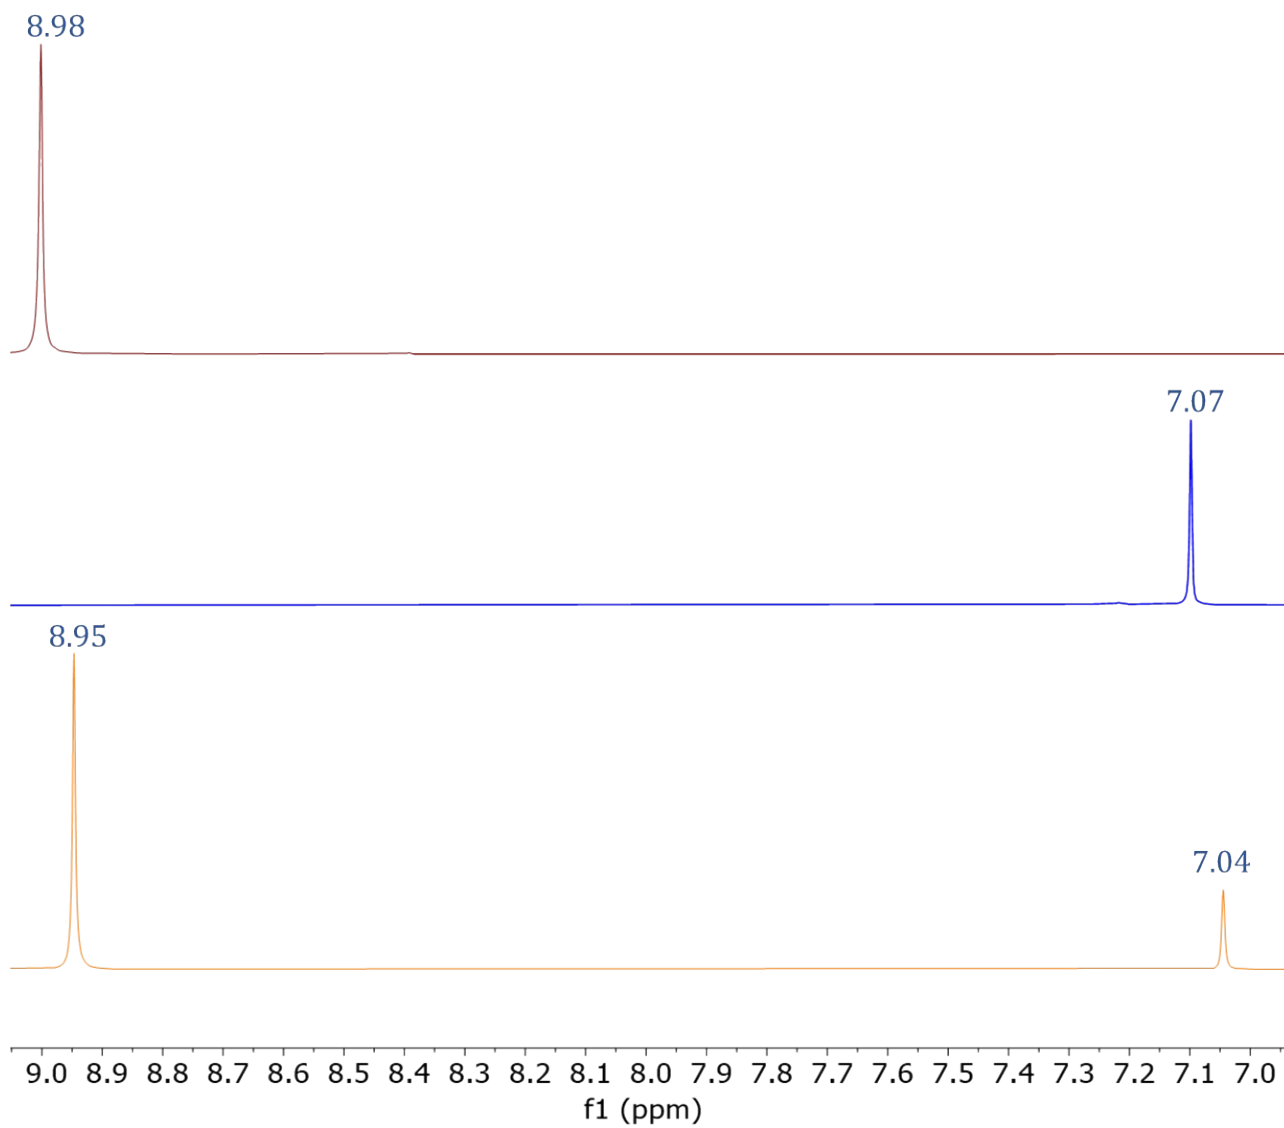



**Figure S4.** Superimposition of IR spectra recorded for the microcrystalline products **1** (a), **2** (b) and **3** (c) obtained by solvent-mediated syntheses and 10 minutes LAG (liquid-assisted grinding), recorded in the range 3200-700  $\text{cm}^{-1}$ .

a)

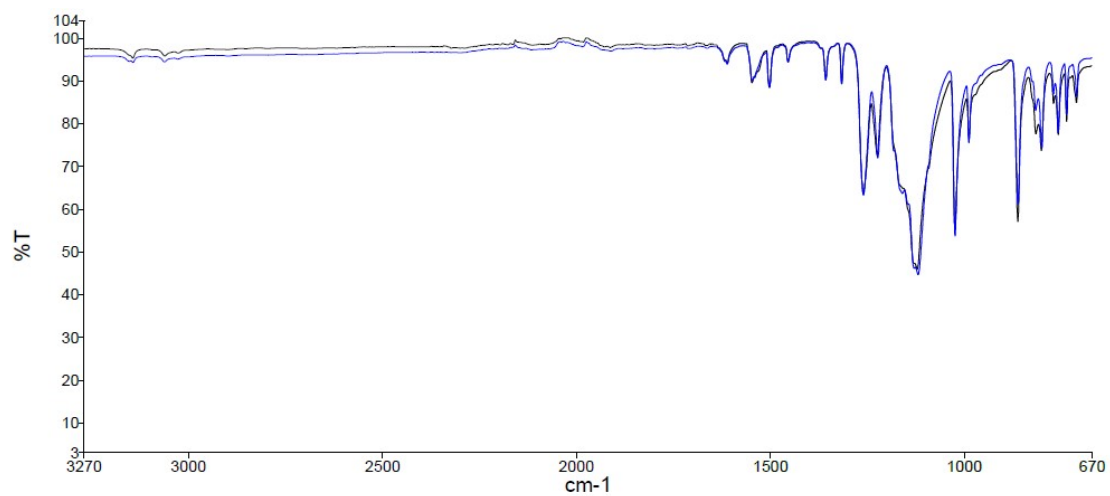

b)

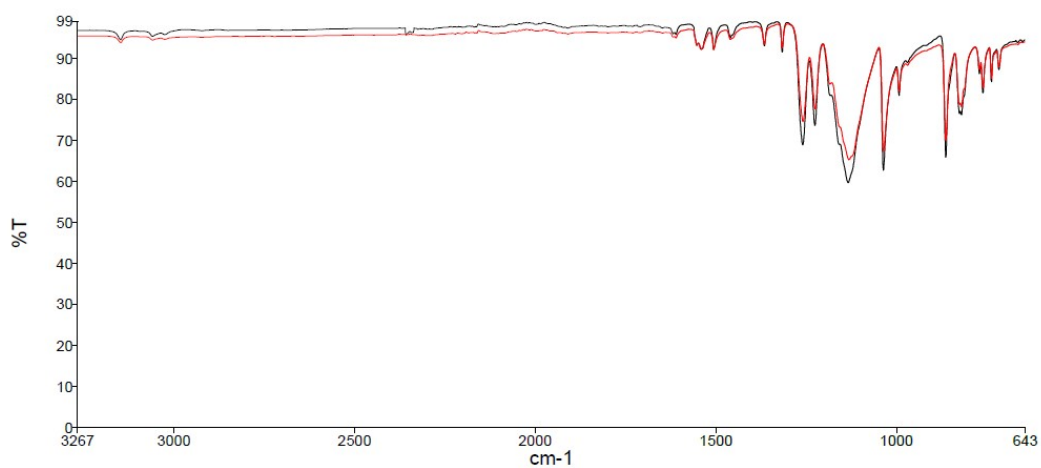

c)

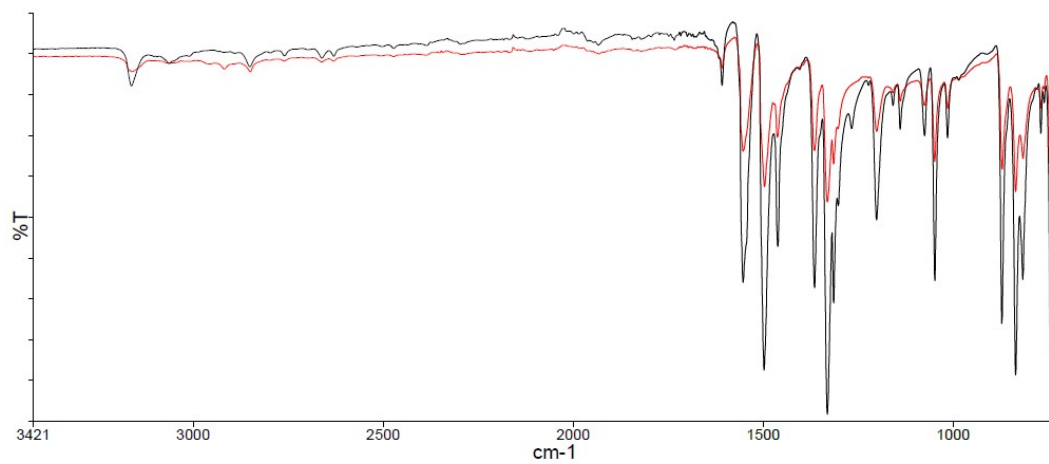

Figure S5. TGA plot with decomposition patterns of 1,2, and 3 (from top to bottom).

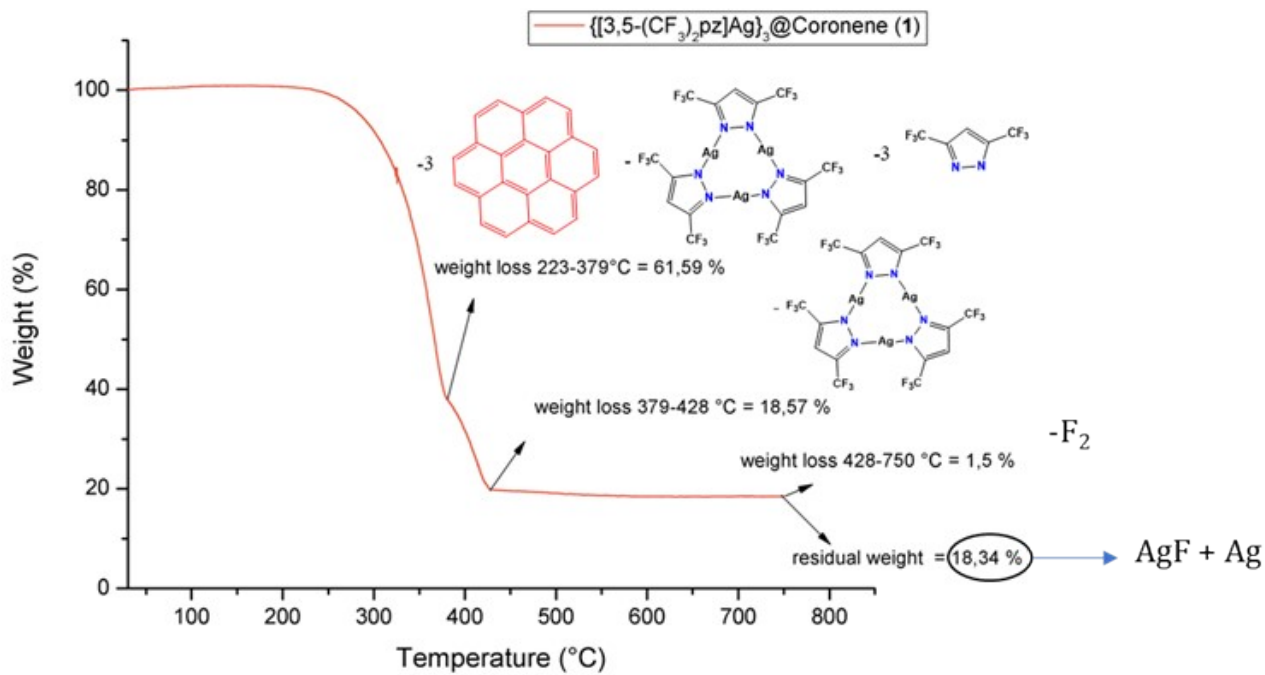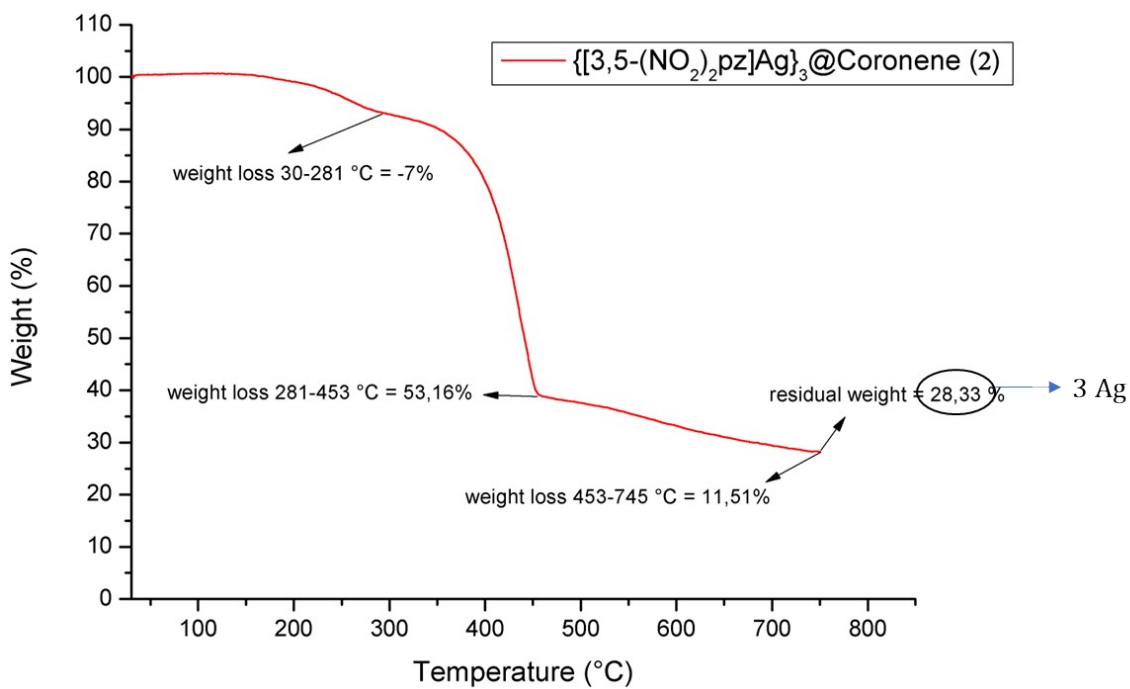

U

Figure 5S. Continue.

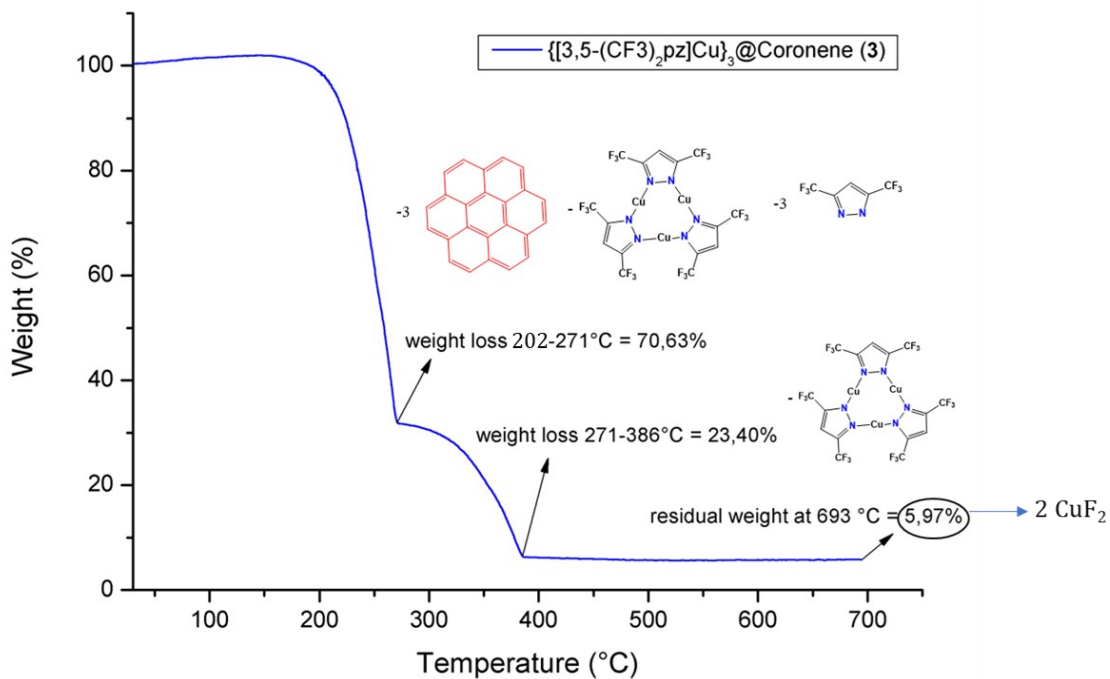

**Figure S6.** Normalized (left) and absolute (right) solid-state excitation/emission spectra of the adduct  $\{[3,5-(\text{CF}_3)_2\text{pz}]\text{Ag}\}_3@ \text{Coronene}$  **1**, a), and  $\{[3,5-(\text{NO}_2)_2\text{pz}]\text{Ag}\}_3@ \text{Coronene}$  **2**, b) in comparison with the emission spectra of the starting compounds in the range 300-630 nm.

a)

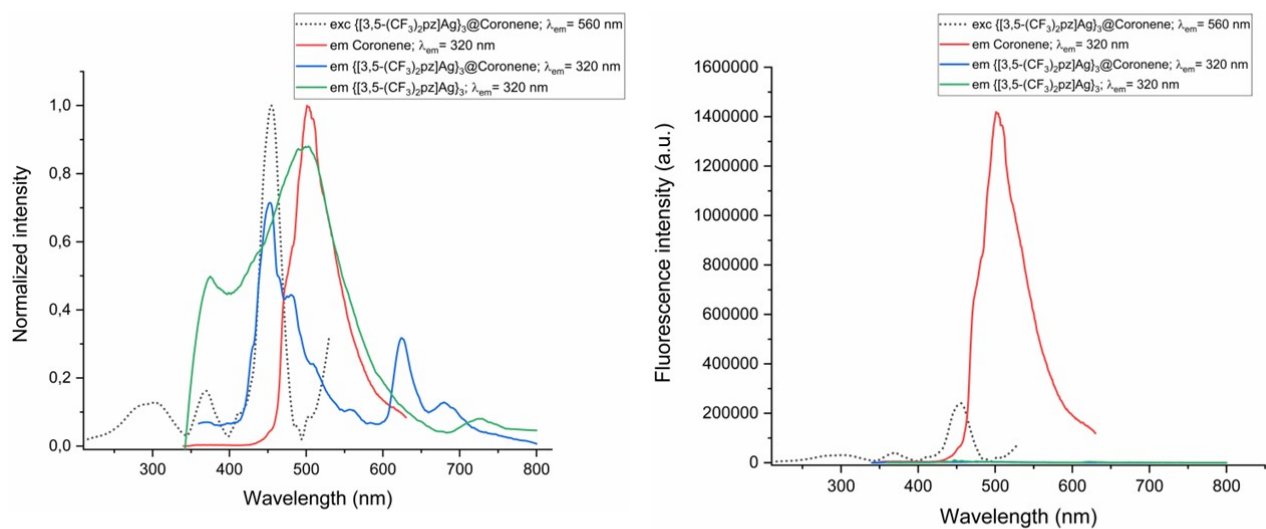

b)

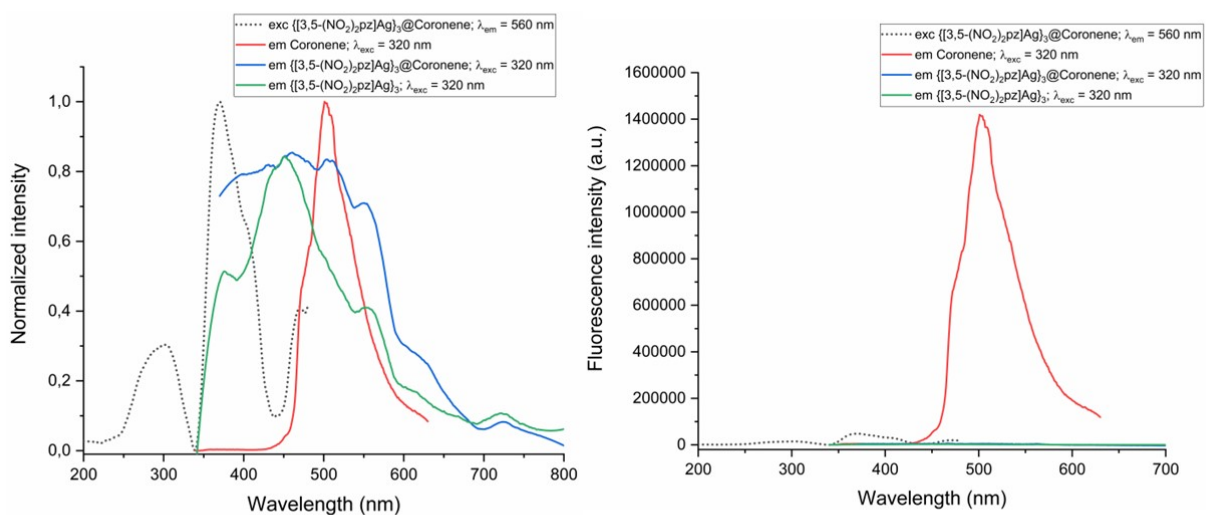

**Figure S7.** Solid state emission spectra of the coronene, of the  $[(CF_3)_2pzCu]_3$  and of the adduct **3** upon excitation at 320 nm at room temperature.

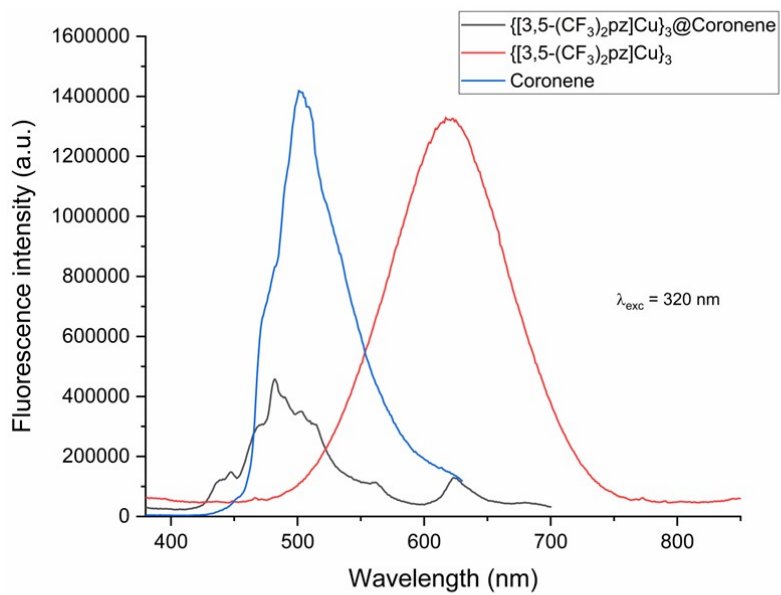

**Figure S8.** Normalized solid state excitation/emission spectra of the coronene/ $[(CF_3)_2pzCu]_3$ , adduct **3**, upon excitation at 320 nm, 360 nm and 400 nm. Upon excitation at 320 nm a weak emission at 560 nm is observed.

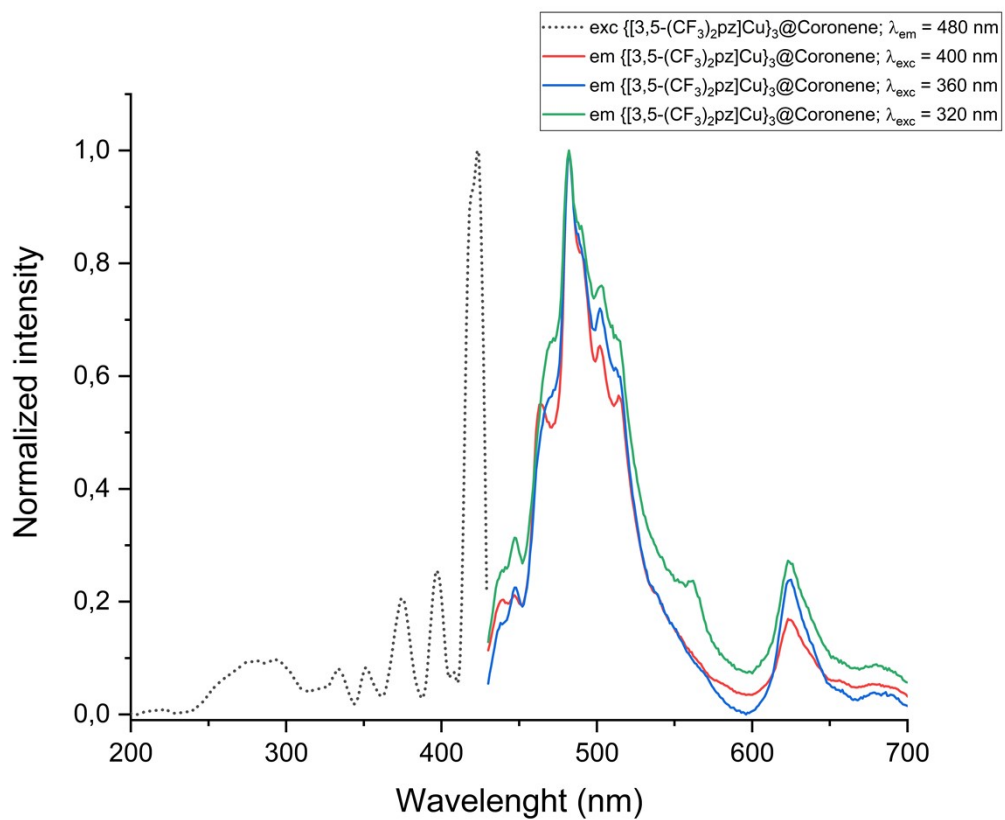

**Figure S9.** Excitation and emission spectra for  $[(CF_3)_2pzCu]_3$ , top left, for coronene, top right, for  $[(NO_2)_2pzAg]_3$ , bottom left, and for  $[(CF_3)_2pzAg]_3$ , bottom right.

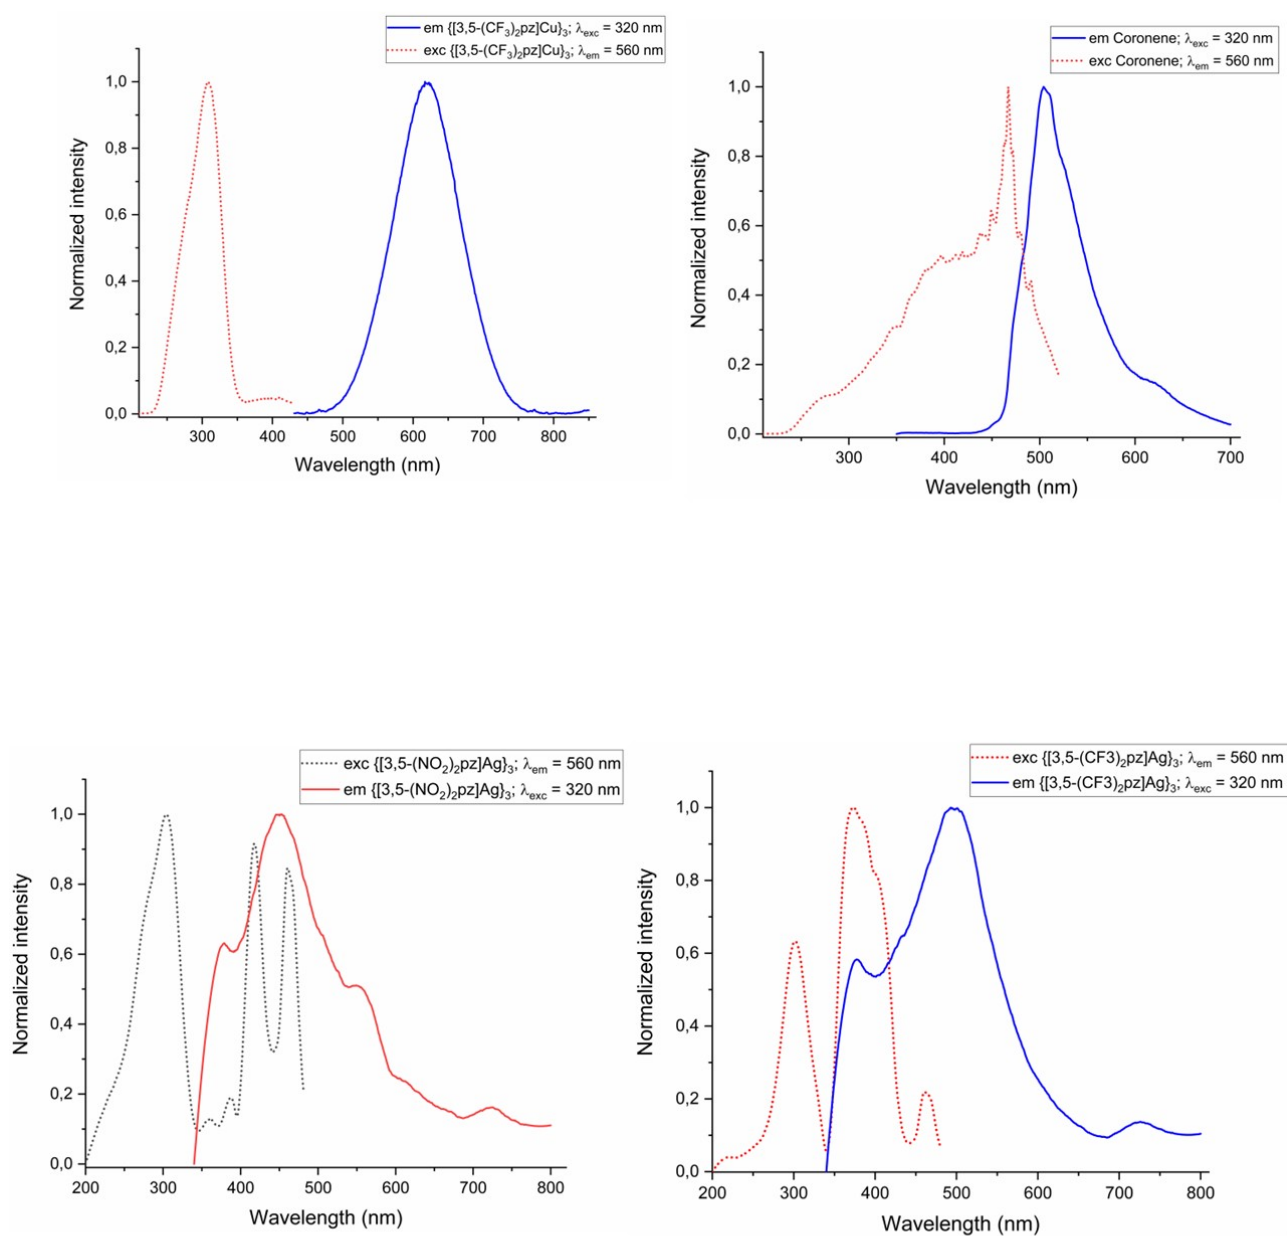

**Figure S10.** Emission bands obtained by exciting at 350 nm a 24.26  $\mu\text{M}$  solution of coronene in DCM and upon titrating with a solution of  $\{[(\text{CF}_3)_2\text{pzCu}]_3\}$  in DCM. The addition of the CTC was performed till a ratio of coronene:  $\{[(\text{CF}_3)_2\text{pzCu}]_3\}$  almost 1:2 (first addition mole ratio  $\{[(\text{CF}_3)_2\text{pzCu}]_3\}$ /coronene = 0.269). The adding of  $\{[(\text{CF}_3)_2\text{pzCu}]_3\}$  did not affected the intensity and emission maxima of coronene.

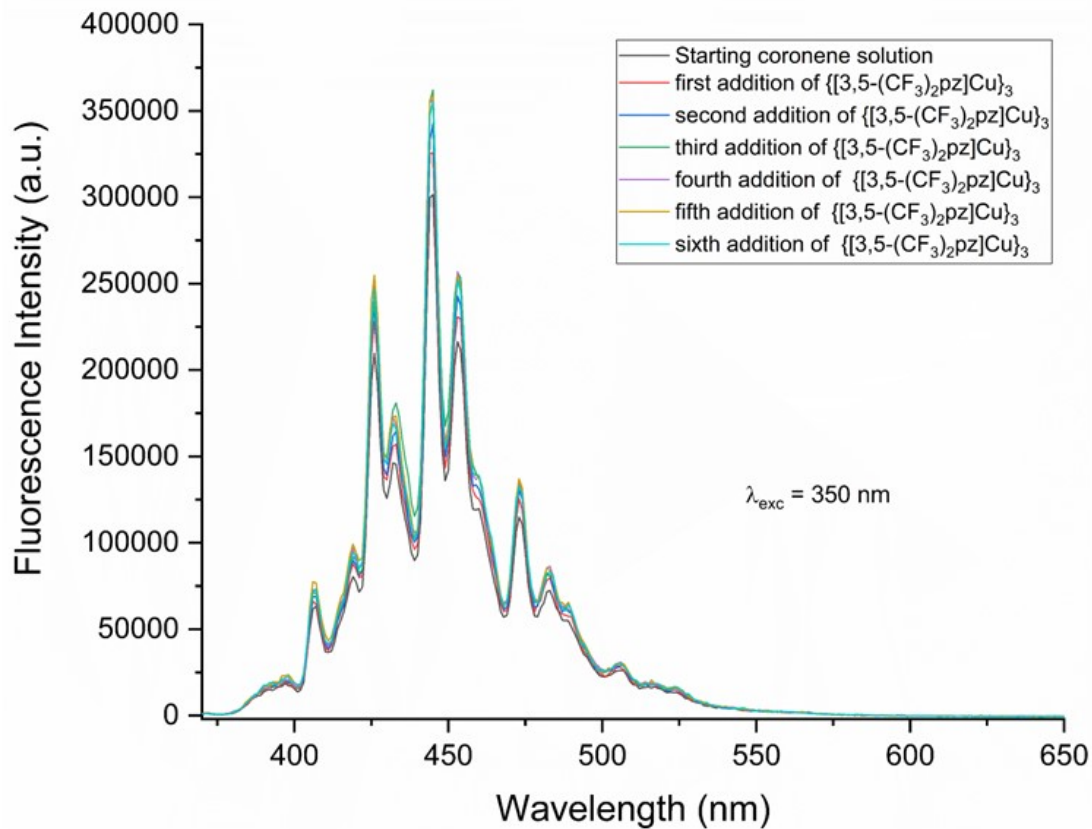



**Figure S11.** Tauc plots of  $\{[3,5-(CF_3)_2pz]Ag\}_3$  with direct (left) and indirect (right) band gap calculations.

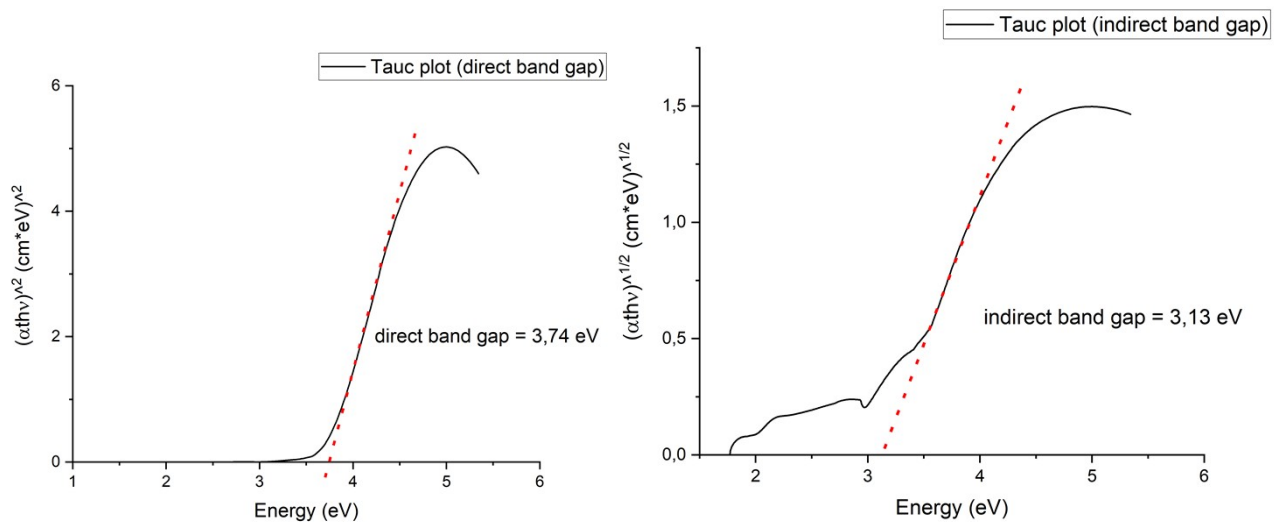

**Figure S12.** Tauc plot of coronene with direct (left) and indirect (right) band gap calculations.

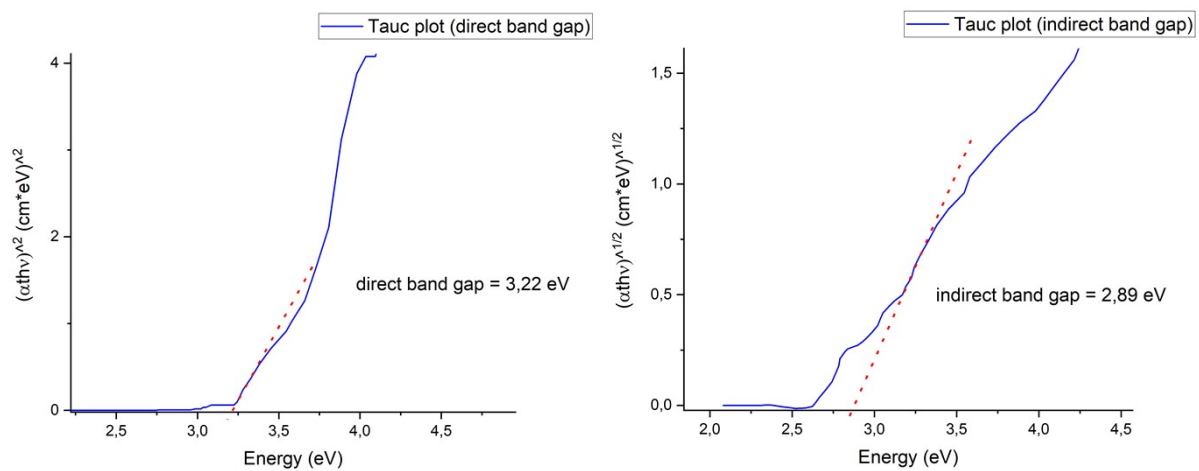

## References:

- 1) A. A. Titov *et al.*, *Eur. J. Inorg. Chem.*, no. 33, pp. 5554–5561, 2012, doi: 10.1002/ejic.201200814.
- 2) L. Colangeli, V. Mennella, G. A. Baratta, E. Bussoletti, and G. Strazzulla, *Astrophys. J.*, vol. 396, p. 369, 1992, doi: 10.1086/171723.
- 3) A. L. Mattioda, A. Ricca, J. Tucker, C. W. Bauschlicher, and L. J. Allamandola, *Astron. J.*, vol. 137, no. 4, pp. 4054–4060, 2009, doi: 10.1088/0004-6256/137/4/4054.
- 4) R. Galassi *et al.*, *Proc. Natl. Acad. Sci. U. S. A.*, vol. 114, no. 26, pp. E5042–E5051, 2017, doi: 10.1073/pnas.1700890114.
- 5) J. W. A. M. Janssen, H. J. Koeners, C. G. Kruse, C.L. Habrakern; *J. Org. Chem.* 1973, 38, 10, 1777–1782. Doi: 10.1021/jo00950a001
- 6) M. Trzebiatowska-Gusowska, K. Piela, T. Misiaszek, M. M. Szostak, and J. Baran, *J. Raman Spectrosc.*, vol. 41, no. 10, pp. 1338–1347, 2010, doi: 10.1002/jrs.2575.
